# Supplementary material for: Tumors Involving the Infratemporal Fossa: A Systematic Review of Clinical Characteristics and Treatment Outcomes
Source: MDPI journal article supplement (doi:10.3390/cancers14215420), 2022-11-03
Supplement: s1 [file s1]

**Supplementary Table S2.** Overview of included articles

|           | <b>Author, Year</b>         | <b>Level of evidence</b> | <b>Cohort size (No. of patients)</b> | <b>No of male patients (%)</b> | <b>Age Mean (range)</b> | <b>Surgical approach (No. of patients)</b>                               | <b>Reconstruction technique and material (No. of patients)</b> | <b>Mean FU in months (range)</b> | <b>Status (No. Patients)</b> |
|-----------|-----------------------------|--------------------------|--------------------------------------|--------------------------------|-------------------------|--------------------------------------------------------------------------|----------------------------------------------------------------|----------------------------------|------------------------------|
| <b>1</b>  | Liu et al., 2020 [16]       | IV                       | 14                                   | 8 (57.1)                       | 47.3 (24-73)            | Condylotomy with posterior disc attachment release (14)                  | -                                                              | 54.8 (36-96)                     | Alive (14)                   |
| <b>2</b>  | Wang et al., 2019 [9]       | IV                       | 1                                    | 0 (0)                          | 27                      | Endoscopic endonasal approach (1)                                        | -                                                              | 48                               | Alive (1)                    |
| <b>3</b>  | Shin et al., 2018 [2]       | IV                       | 3                                    | 0 (0)                          | 52 (38-66)              | Endoscopic endonasal approach (3)                                        | -                                                              | 18 (12-30)                       | Alive (3)                    |
| <b>4</b>  | Lee et al., 2017 [33]       | IV                       | 1                                    | 1 (100)                        | 80                      | Endoscopic Denker's Approach (1)                                         | -                                                              | 12                               | Alive (1)                    |
| <b>5</b>  | Zhou et al., 2016 [1]       | IV                       | 6                                    | 4 (66.7)                       | 42 (29-59)              | Endoscopic prelacrima recess approach (6)                                | -                                                              | 26.2 (17-46)                     | Alive (6)                    |
| <b>6</b>  | Haidar et al., 2015 [29]    | IV                       | 2                                    | 0 (0)                          | 35.5 (22-49)            | Preauricular subtemporal approach (1)/Endoscopic transnasal approach (1) | -                                                              | 15 (12-18)                       | Alive (2)                    |
| <b>7</b>  | Nomura et al., 2014 [3]     | IV                       | 3                                    | 2(66.7)                        | 23.7 (17-27)            | Orbito-zygomatic approach (1)/Left temporal craniotomy (1)               | Antero-lateral thigh flap (1)                                  | 57 (17-108)                      | Alive (1)/Dead (2)           |
| <b>8</b>  | Kekatpure et al., 2014 [24] | IV                       | 4                                    | 4 (100)                        | 47.8 (33-65)            | Mandibulotomy approach (3)                                               | Adipofacial anterolateral thigh flap (4)                       | -                                | Alive (4)                    |
| <b>9</b>  | Morace et al., 2012 [22]    | IV                       | 1                                    | 1 (100)                        | 14                      | -                                                                        | -                                                              | 12                               | Alive (1)                    |
| <b>10</b> | Zhang et al., 2012 [51]     | IV                       | 8                                    | 4 (50)                         | 44.1 (31-61)            | Endoscopic endonasal approach (8)                                        | -                                                              | 30 (10-74)                       | Alive (8)                    |
| <b>11</b> | Deneuve et al., 2012 [27]   | IV                       | 9                                    | 9 (100)                        | -                       | Transmandibular (3)/Cervical (3)/Degloving (2)/Coronal (1)               | Latissimus dorsi free flap (3)                                 | 47.4 (16-96)                     | Alive (7)/Dead (2)           |
| <b>12</b> | Xu et al., 2011 [26]        | IV                       | 5                                    | 1 (20)                         | 37.8 (21-57)            | Endoscopic extended medial maxillectomy (5)                              | -                                                              | 33.4 (12-78)                     | Dead (5)                     |

|    |                                 |    |    |          |              |                                                                                                              |   |              |                     |
|----|---------------------------------|----|----|----------|--------------|--------------------------------------------------------------------------------------------------------------|---|--------------|---------------------|
| 13 | Al-Daraji et al., 2009 [33]     | IV | 2  | 1 (50)   | 25 (24-26)   | -                                                                                                            | - | 21 (12-30)   | Dead (2)            |
| 14 | Chatni et al., 2009 [20]        | IV | 13 | 13 (100) | -            | Mandibulotomy approach (13)                                                                                  | - | 18.5 (4-49)  | Alive (10)/Dead (3) |
| 15 | Kakudo et al., 2008 [21]        | IV | 2  | 2 (100)  | 67 (53-81)   | Temporal and buccal incision (1)/Preauricular-submandibular incision (1)                                     | - | 48 (36-60)   | Alive (2)           |
| 16 | Folk et al., 2007 [31]          | IV | 1  | 1 (100)  | 19           | -                                                                                                            | - | 15           | Dead (1)            |
| 17 | Galioto et al., 2006 [19]       | IV | 2  | 1 (50)   | 44 (24-64)   | Submandibular cutaneous incision (1)/Antero-lateral, transcraniofacial, subtemporal, extradural approach (1) | - | 2            | Alive (2)           |
| 18 | Chung et al., 2004 [15]         | IV | 1  | 0        | 43           | -                                                                                                            | - | 60           | Alive (1)           |
| 19 | Dare et al., 2003 [30]          | IV | 2  | 2 (100)  | 18.5 (18-19) | -                                                                                                            | - | 24           | Alive (2)           |
| 20 | Pieper et al., 1999 [35]        | IV | 9  | 3 (33.3) | 53.9 (32-73) | Middle fossa/zygomatic approach (9)                                                                          | - | 20.7 (2-36)  | Alive (8)/Dead (1)  |
| 21 | Krishnamurthy et al., 1998 [25] | IV | 2  | 0 (0)    | 52 (49-55)   | Orbitozygomatic osteotomy (1)/Zygomatic osteotomy (1)                                                        | - | 3.75 (1.5-6) | Alive (2)           |
| 22 | Sichel et al., 1994 [28]        | IV | 2  | 0 (0)    | 50.5 (47-54) | Trancochlear approach (1)                                                                                    | - | 39 (6-72)    | Alive (2)           |
| 23 | Wenig et al., 1993 [14]         | IV | 1  | 0 (0)    | 50           | -                                                                                                            | - | 72           | Alive (1)           |
| 24 | Colmenero et al., 1991 [18]     | IV | 2  | 0 (0)    | 58 (54-62)   | Latero-facial approach (2)                                                                                   | - | 18 (6-30)    | Alive (1)/Dead (1)  |
| 25 | Murayama et al., 1988 [6]       | IV | 1  | 1 (100)  | 30           | Submandibular and preauricular approach (1)                                                                  | - | 29           | Alive (1)           |

|           |                               |    |   |          |                 |                                                                   |   |           |                          |
|-----------|-------------------------------|----|---|----------|-----------------|-------------------------------------------------------------------|---|-----------|--------------------------|
| <b>26</b> | Shapshay et al.,<br>1976 [7]  | IV | 7 | 5 (71.4) | 57.7<br>(45-72) | Parotidectomy incision<br>(1)/Transzygomatic arch<br>approach (1) | - | 22 (8-36) | -                        |
| <b>27</b> | Buchanan et al.,<br>1975 [34] | IV | 2 | 0 (0)    | 23.5<br>(17-30) | Parotidectomy incision<br>(1)/Weber Fergusson<br>approach (1)     | - | 10 (8-12) | Alive<br>(1)/Dead<br>(1) |

Data are presented as frequency (%) or mean (range), unless otherwise indicated. Values displayed are of included cases only. “-” indicates data were not reported, incalculable, or indistinguishable from a larger cohort. FU, Follow-up.
