# Supplementary material for: Tumors Involving the Infratemporal Fossa: A Systematic Review of Clinical Characteristics and Treatment Outcomes
Source: MDPI journal article supplement (doi:10.3390/cancers14215420), 2022-11-03
Supplement: s1 [file s1]

**Supplementary Table S1.** Risk of bias assessments for included studies

| <b>JBI Checklist for Case Series – Criteria</b>                                                                  |
|------------------------------------------------------------------------------------------------------------------|
| 1. Were there clear criteria for inclusion in the case series?                                                   |
| 2. Was the condition measured in a standard, reliable way for all participants included in the case series?      |
| 3. Were valid methods used for identification of the condition for all participants included in the case series? |
| 4. Did the case series have consecutive inclusion of participants?                                               |
| 5. Did the case series have complete inclusion of participants?                                                  |
| 6. Was there clear reporting of the demographics of the participants in the study?                               |
| 7. Was there clear reporting of clinical information of the participants?                                        |
| 8. Were the outcomes or follow up results of cases clearly reported?                                             |
| 9. Was there clear reporting of the presenting site(s)/clinic(s) demographic information?                        |
| 10. Was statistical analysis appropriate?                                                                        |
| <b>Responses Options:</b> Yes, No, Unclear, Not Applicable (NA)                                                  |
| <b>Quality Rating:</b> Poor 0 – 3; Fair 4 – 7; Good 8 – 10                                                       |

| <b>Study</b>                | <b>1</b> | <b>2</b> | <b>3</b> | <b>4</b> | <b>5</b> | <b>6</b> | <b>7</b> | <b>8</b> | <b>9</b> | <b>10</b> | <b>Appraisal</b> |
|-----------------------------|----------|----------|----------|----------|----------|----------|----------|----------|----------|-----------|------------------|
| Liu et al., 2020 [16]       | Yes      | No       | Yes       | 9 – Good         |
| Wang et al., 2019 [9]       | Yes      | Yes      | Yes      | Yes      | Yes      | No       | No       | Yes      | Yes      | Yes       | 8– Good          |
| Shin et al., 2018 [2]       | Yes      | No       | Yes       | 9– Good          |
| Lee et al., 2017 [33]       | Yes      | Yes      | Yes      | No       | Yes      | Yes      | Yes      | Yes      | Yes      | Yes       | 9 – Good         |
| Zhou et al., 2016 [1]       | Yes       | 10 - Good        |
| Haidar et al., 2015 [29]    | Yes      | Yes      | Yes      | Yes      | Yes      | Yes      | No       | Yes      | No       | Yes       | 8 – Good         |
| Nomura et al., 2014 [3]     | Yes      | No       | Yes       | 9 - Good         |
| Kekatpure et al., 2014 [24] | Yes      | No       | Yes       | 9 - Good         |
| Morace et al., 2012 [22]    | Yes      | Yes      | Yes      | Yes      | No       | Yes      | Yes      | Yes      | Yes      | Yes       | 9 – Good         |
| Zhang et al., 2012 [51]     | Yes       | 10 - Good        |
| Deneuve et al., 2012 [27]   | Yes      | Yes      | Yes      | Yes      | Yes      | Yes      | No       | Yes      | No       | Yes       | 8 – Good         |
| Xu et al., 2011 [26]        | Yes      | No       | Yes       | 9 - Good         |
| Al-Daraji et al., 2009 [33] | Yes      | No       | Yes       | 9 - Good         |
| Chatni et al., 2009 [20]    | Yes      | No       | Yes       | 9 – Good         |
| Kakudo et al., 2008 [21]    | Yes      | No       | Yes       | 9– Good          |
| Folk et al., 2007 [31]      | Yes      | Yes      | Yes      | No       | Yes      | Yes      | Yes      | Yes      | Yes      | Yes       | 9– Good          |
| Galioto et al., 2006 [19]   | Yes       | 10 - Good        |
| Chung et al., 2004 [15]     | Yes      | Yes      | Yes      | Yes      | Yes      | No       | Yes      | Yes      | Yes      | Yes       | 9 – Good         |
| Dare et al., 2003 [30]      | Yes      | Yes      | Yes      | Yes      | Yes      | Yes      | No       | Yes      | No       | Yes       | 8 – Good         |
| Pieper et al., 1999 [35]    | Yes      | No       | Yes       | 9 - Good         |
| Krishnamurthy et al., 1998  | Yes      | No       | Yes       | 9 - Good         |

|                             |     |     |     |     |     |     |     |     |     |     |           |
|-----------------------------|-----|-----|-----|-----|-----|-----|-----|-----|-----|-----|-----------|
| [25]                        |     |     |     |     |     |     |     |     |     |     |           |
| Sichel et al., 1994 [28]    | Yes | 10 - Good |
| Wenig et al., 1993 [14]     | Yes | Yes | Yes | No  | Yes | Yes | Yes | Yes | Yes | Yes | 9 – Good  |
| Colmenero et al., 1991 [18] | Yes | No  | Yes | 9 - Good  |
| Murayama et al., 1988 [6]   | Yes | Yes | Yes | Yes | Yes | Yes | No  | Yes | Yes | Yes | 9 – Good  |
| Shapshay et al., 1976 [7]   | Yes | Yes | Yes | Yes | Yes | Yes | No  | Yes | No  | Yes | 8 – Good  |
| Buchanan et al., 1975 [34]  | Yes | No  | Yes | 9 - Good  |
| Liu et al., 2020 [16]       | Yes | No  | Yes | 9 - Good  |
